# Supplementary material for: Stretchable superhydrophobic fluororubber fabricated by transferring mesh microstructures
Source: Royal Society of Chemistry journal article supplement (doi:10.1039/d2sm01677j), 2023-01-01
Supplement: d2sm01677j1.pdf [file d2sm01677j1.pdf]

## Supporting Information

### Stretchable superhydrophobic fluororubber fabricated by transferring mesh microstructure

Jiwen Wang<sup>1, 2,3#</sup>, Yanbin Zhang<sup>1#</sup>, Qiang He<sup>2\*</sup>

1. School of Mechatronics Engineering, Henan University of Science and Technology, Henan, Luoyang 471003, China

2. College of Civil Aviation Safety Engineering, Civil Aviation Flight University of China, Sichuan, Guanghan, 618307, China

Corresponding author. E-mail address: Qiang He, aystar@163.com

<sup>#</sup>These authors contributed equally.

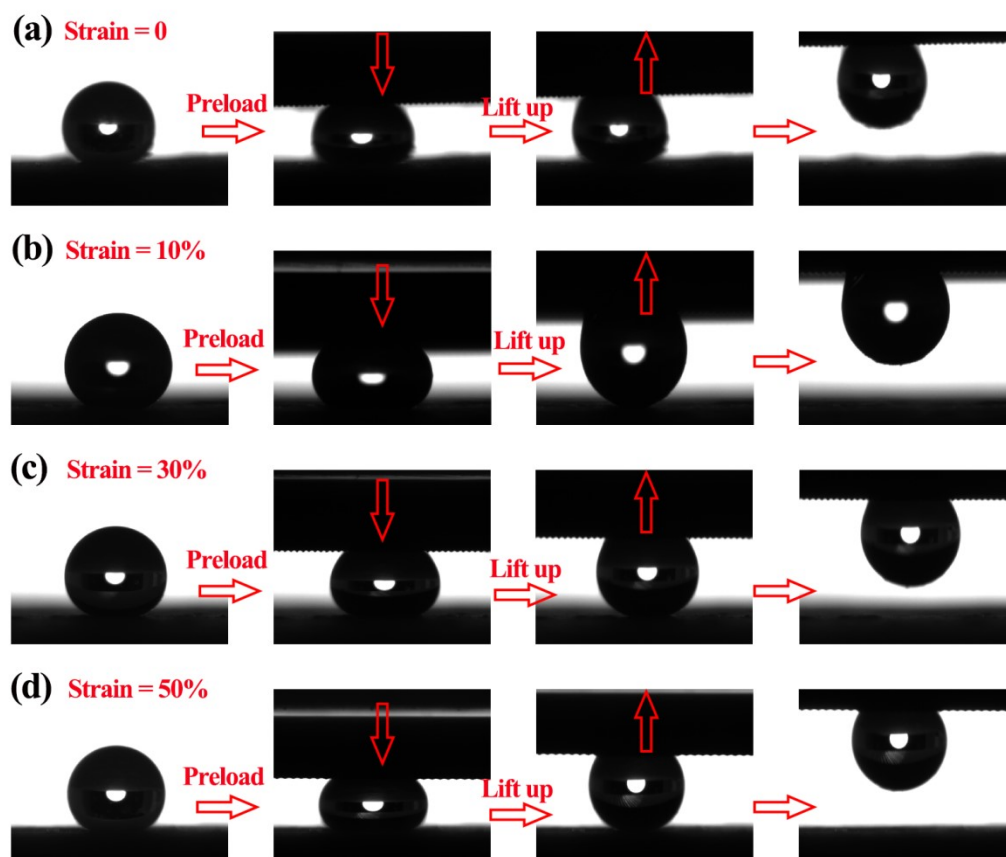

Fig. S1 Droplet transfer behavior of 1600# superhydrophobic fluororubber surface at different stretching strains

The vulcanization degree of rubber was verified by hydrolysis experiment (Fig. S2). In this work, the sample is put into high-temperature water to accelerate the dissolution and extraction of the residual substances in the sample. This method can accelerate the simulation of high-temperature and high-humidity aging conditions, and the precipitated residual substances will form white spray cream on the surface of the sample. The specific steps are as follows: pour deionized water into a beaker, immerse the sample in water, and then put it in a 90°C oven for 22 hours. After taking out the sample, use a non-woven fabric to absorb the residual water stains on the surface, and observe the surface of the non-woven fabric after natural drying for 30min. If the sample is not fully vulcanized, white hydrolysate will be produced. From the high-definition experimental photos, it can be seen that there is no white material residue on the surface of the sample and non-woven fabric, which indicates that the sample is fully vulcanized, and it is also confirmed that the use of templates during vulcanization will not affect the rubber cross-linking.

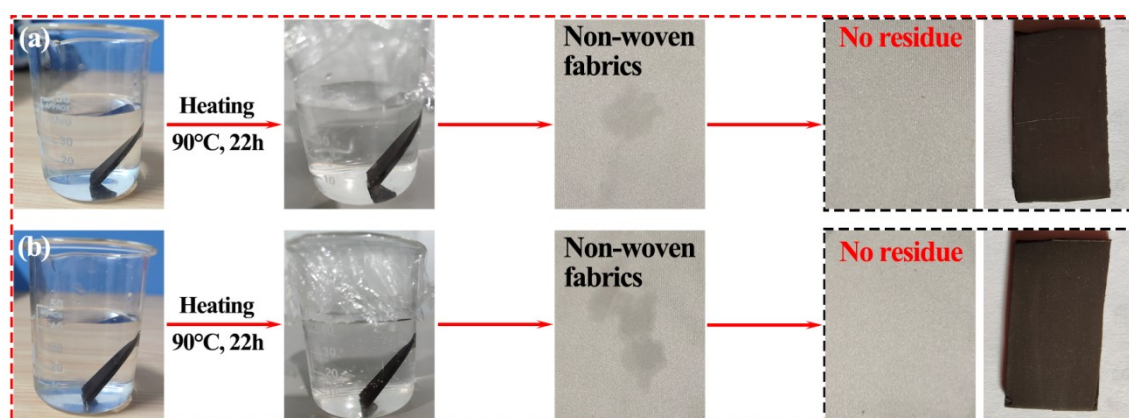

Fig. S2 High-definition photos of sample hydrolysis process: (a) Original rubber, (b)

1600#rubber.
